# Supplementary material
Source: publisher figshare collection journal article supplement (https://acs.figshare.com/ndownloader/files/4100074)

# checkCIF/PLATON report

You have not supplied any structure factors. As a result the full set of tests cannot be run.

No syntax errors found.      CIF dictionary      Interpreting this report

## Datablock: aa704

---

|                 |                    |                                      |
|-----------------|--------------------|--------------------------------------|
| Bond precision: | C-C = 0.0138 A     | Wavelength=0.71069                   |
| Cell:           | a=10.657(1)        | b=15.472(1)      c=19.027(1)         |
|                 | alpha=101.860(1)   | beta=94.240(1)      gamma=104.373(1) |
| Temperature:    | 150 K              |                                      |
|                 | Calculated         | Reported                             |
| Volume          | 2948.3(4)          | 2948.2(4)                            |
| Space group     | P -1               | P-1                                  |
| Hall group      | -P 1               | -P 1                                 |
| Moiety formula  | C60 H78 N3 O3 P2 Y | C60 H78 N3 O3 P2 Y, 1/2<br>(C5 H12)  |
| Sum formula     | C60 H78 N3 O3 P2 Y | C62.50 H84 N3 O3 P2 Y                |
| Mr              | 1040.11            | 1076.18                              |
| Dx,g cm-3       | 1.172              | 1.212                                |
| Z               | 2                  | 2                                    |
| Mu (mm-1)       | 1.086              | 1.089                                |
| F000            | 1104.0             | 1146.0                               |
| F000'           | 1099.15            |                                      |
| h,k,lmax        | 11,16,20           | 11,16,20                             |
| Nref            | 7197               | 6749                                 |
| Tmin,Tmax       | 0.925,0.957        | 0.863,0.958                          |
| Tmin'           | 0.859              |                                      |

Correction method= MULTI-SCAN

Data completeness= 0.938      Theta(max)= 21.970

R(reflections)= 0.0839( 4740)      wR2(reflections)= 0.1817( 6749)

S = 1.102      Npar= 641

---

The following ALERTS were generated. Each ALERT has the format  
**test-name\_ALERT\_alert-type\_alert-level.**

Click on the hyperlinks for more details of the test.

---

### Alert level A

THETM01\_ALERT\_3\_A The value of sine(theta\_max)/wavelength is less than 0.550

Calculated sin(theta\_max)/wavelength = 0.5264

PLAT029\_ALERT\_3\_A \_diffn\_measured\_fraction\_theta\_full Low ..... 0.938

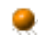**Alert level B**

PLAT601\_ALERT\_2\_B Structure Contains Solvent Accessible VOIDS of . 183 A\*\*3

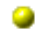**Alert level C**

CHEMW03\_ALERT\_2\_C The ratio of given/expected molecular weight as  
calculated from the \_atom\_site\* data lies outside  
the range 0.99 <> 1.01

From the CIF: \_cell\_formula\_units\_Z 2

From the CIF: \_chemical\_formula\_weight 1076.18

TEST: Calculate formula weight from \_atom\_site\_\*

| atom | mass  | num   | sum    |
|------|-------|-------|--------|
| C    | 12.01 | 60.00 | 720.66 |
| H    | 1.01  | 78.00 | 78.62  |
| N    | 14.01 | 3.00  | 42.02  |
| O    | 16.00 | 3.00  | 48.00  |
| P    | 30.97 | 2.00  | 61.95  |
| Y    | 88.91 | 1.00  | 88.91  |

Calculated formula weight 1040.16

REFLT03\_ALERT\_3\_C Reflection count < 95% complete

From the CIF: \_diffn\_refl\_theta\_max 21.97

From the CIF: \_diffn\_refl\_theta\_full 21.97

From the CIF: \_reflns\_number\_total 6749

TEST2: Reflins within \_diffn\_refl\_theta\_max

Count of symmetry unique reflns 7197

Completeness (\_total/calc) 93.78%

PLAT041\_ALERT\_1\_C Calc. and Reported SumFormula Strings Differ ?

PLAT043\_ALERT\_1\_C Check Reported Molecular Weight ..... 1076.18

PLAT068\_ALERT\_1\_C Reported F000 Differs from Calcd (or Missing)... ?

PLAT222\_ALERT\_3\_C Large Non-Solvent H Uiso(max)/Uiso(min) .. 6.6 Ratio

PLAT234\_ALERT\_4\_C Large Hirshfeld Difference C15 -- C17 .. 0.17 Ang.

PLAT234\_ALERT\_4\_C Large Hirshfeld Difference C46 -- C47 .. 0.16 Ang.

PLAT234\_ALERT\_4\_C Large Hirshfeld Difference C47 -- C48 .. 0.17 Ang.

PLAT242\_ALERT\_2\_C Check Low Ueq as Compared to Neighbors for C41

PLAT242\_ALERT\_2\_C Check Low Ueq as Compared to Neighbors for C57

PLAT245\_ALERT\_2\_C U(iso) H2N Smaller than U(eq) N2 by ... 0.014 AngSq

PLAT341\_ALERT\_3\_C Low Bond Precision on C-C Bonds ..... 0.0138 Ang

PLAT420\_ALERT\_2\_C D-H Without Acceptor N2 - H2N ... ?

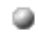**Alert level G**

FORMU01\_ALERT\_2\_G There is a discrepancy between the atom counts in the  
\_chemical\_formula\_sum and the formula from the \_atom\_site\* data.

Atom count from \_chemical\_formula\_sum: C62.5 H84 N3 O3 P2 Y1

Atom count from the \_atom\_site data: C60 H78 N3 O3 P2 Y1

CELLZ01\_ALERT\_1\_G Difference between formula and atom\_site contents detected.

CELLZ01\_ALERT\_1\_G ALERT: Large difference may be due to a

symmetry error - see SYMMG tests

From the CIF: \_cell\_formula\_units\_Z 2

From the CIF: \_chemical\_formula\_sum C62.50 H84 N3 O3 P2 Y

TEST: Compare cell contents of formula and atom\_site data

| atom | Z*formula | cif sites | diff  |
|------|-----------|-----------|-------|
| C    | 125.00    | 120.00    | 5.00  |
| H    | 168.00    | 156.00    | 12.00 |
| N    | 6.00      | 6.00      | 0.00  |
| O    | 6.00      | 6.00      | 0.00  |
| P    | 4.00      | 4.00      | 0.00  |

|   |      |      |      |  |
|---|------|------|------|--|
| Y | 2.00 | 2.00 | 0.00 |  |
|---|------|------|------|--|

PLAT005\_ALERT\_5\_G No \_iucr\_refine\_instructions\_details in the CIF ?  
 PLAT083\_ALERT\_2\_G SHELXL Second Parameter in WGHT Unusually Large. 15.06  
 PLAT153\_ALERT\_1\_G The su's on the Cell Axes are Equal ..... 0.00100 Ang.  
 PLAT154\_ALERT\_1\_G The su's on the Cell Angles are Equal ..... 0.00100 Deg.

---

3 **ALERT level A** = Most likely a serious problem - resolve or explain  
 1 **ALERT level B** = A potentially serious problem, consider carefully  
 14 **ALERT level C** = Check. Ensure it is not caused by an omission or oversight  
 7 **ALERT level G** = General information/check it is not something unexpected

8 ALERT type 1 CIF construction/syntax error, inconsistent or missing data  
 8 ALERT type 2 Indicator that the structure model may be wrong or deficient  
 5 ALERT type 3 Indicator that the structure quality may be low  
 3 ALERT type 4 Improvement, methodology, query or suggestion  
 1 ALERT type 5 Informative message, check

---

## Datablock: pa679bis

---

Bond precision: C-C = 0.0063 A Wavelength=0.71069

Cell: a=27.529(1) b=28.356(1) c=18.325(1)  
 alpha=90 beta=124.463(1) gamma=90

Temperature: 150 K

|                | Calculated            | Reported                            |
|----------------|-----------------------|-------------------------------------|
| Volume         | 11794.1(9)            | 11794.1(9)                          |
| Space group    | C 2/c                 | C2/c                                |
| Hall group     | -C 2yc                | -C 2yc                              |
| Moiety formula | C114 H144 N6 O6 P4 Y2 | C114 H144 N6 O6 P4 Y2,<br>2(C6 H12) |
| Sum formula    | C114 H144 N6 O6 P4 Y2 | C126 H168 N6 O6 P4 Y2               |
| Mr             | 1996.05               | 2164.36                             |
| Dx, g cm-3     | 1.124                 | 1.219                               |
| Z              | 4                     | 4                                   |
| Mu (mm-1)      | 1.084                 | 1.089                               |
| F000           | 4224.0                | 4608.0                              |
| F000'          | 4204.54               |                                     |
| h,k,lmax       | 33,34,22              | 33,34,22                            |
| Nref           | 11614                 | 11468                               |
| Tmin,Tmax      | 0.787,0.804           | 0.796,0.812                         |
| Tmin'          | 0.787                 |                                     |

Correction method= MULTI-SCAN

Data completeness= 0.987 Theta(max)= 26.020

R(reflections)= 0.0565( 8593) wR2(reflections)= 0.1259( 11468)

Npar= 635

```
test-name ALERT alert-type alert-level.
```

Click on the hyperlinks for more details of the test.

PLAT073 ALERT 1 A H-atoms ref, but hydrogen treatment reported as constr

CHEMW03\_ALERT\_2\_B WARNING: The ratio of given/expected molecular weight as calculated from the \_atom\_site\* data lies outside the range 0.95 <> 1.05

From the CIF: chemical formula weight 2164.36

TEST: Calculate formula weight from atom site \*

| atom | mass  | num    | sum     |
|------|-------|--------|---------|
| C    | 12.01 | 114.00 | 1369.25 |
| H    | 1.01  | 144.00 | 145.15  |
| N    | 14.01 | 6.00   | 84.04   |
| O    | 16.00 | 6.00   | 95.99   |
| P    | 30.97 | 4.00   | 123.90  |
| Y    | 88.91 | 2.00   | 177.81  |

|                           |         |
|---------------------------|---------|
| Calculated formula weight | 1996.15 |
|---------------------------|---------|

PLAT420\_ALERT\_2\_B D-H Without Acceptor 04 - H40 ... ?

|                   |                                                  |                                  |            |
|-------------------|--------------------------------------------------|----------------------------------|------------|
| PLAT041_ALERT_1_C | Calc. and Reported SumFormula                    | Strings Differ                   | ?          |
| PLAT068_ALERT_1_C | Reported F000 Differs from Calcd (or Missing)... |                                  | ?          |
| PLAT220_ALERT_2_C | Large Non-Solvent C                              | Ueq(max)/Ueq(min) ...            | 3.8 Ratio  |
| PLAT230_ALERT_2_C | Hirshfeld Test Diff for C15                      | -- C16B ..                       | 6.5 su     |
| PLAT230_ALERT_2_C | Hirshfeld Test Diff for C15                      | -- C18B ..                       | 6.0 su     |
| PLAT241_ALERT_2_C | Check High                                       | Ueq as Compared to Neighbors for | C23        |
| PLAT242_ALERT_2_C | Check Low                                        | Ueq as Compared to Neighbors for | C15        |
| PLAT242_ALERT_2_C | Check Low                                        | Ueq as Compared to Neighbors for | C41        |
| PLAT341_ALERT_3_C | Low Bond Precision on C-C Bonds .....            |                                  | 0.0063 Ang |
| PLAT774_ALERT_1_C | Suspect X-Y Bond in CIF: Y1                      | -- Y1 ..                         | 3.92 Ang.  |

```

FORMU01_ALERT_2_G There is a discrepancy between the atom counts in the
    _chemical_formula_sum and the formula from the _atom_site* data.
    Atom count from _chemical_formula_sum: C126 H168 N6 O6 P4 Y2
    Atom count from the _atom_site data:  C114 H144 N6 O6 P4 Y2
CELLZ01_ALERT_1_G Difference between formula and atom_site contents detected.
CELLZ01_ALERT_1_G ALERT: Large difference may be due to a
    symmetry error - see SYMMG tests
    From the CIF: _cell_formula_units_Z      4
    From the CIF: _chemical_formula_sum      C126 H168 N6 O6 P4 Y2
    TEST: Compare cell contents of formula and atom site data

```

| atom | Z*formula | cif sites | diff  |
|------|-----------|-----------|-------|
| C    | 504.00    | 456.00    | 48.00 |
| H    | 672.00    | 576.00    | 96.00 |
| N    | 24.00     | 24.00     | 0.00  |
| O    | 24.00     | 24.00     | 0.00  |
| P    | 16.00     | 16.00     | 0.00  |

|                   |                                                  |      |       |                   |
|-------------------|--------------------------------------------------|------|-------|-------------------|
| Y                 | 8.00                                             | 8.00 | 0.00  |                   |
| PLAT002_ALERT_2_G | Number of Distance or Angle Restraints on AtSite |      |       | 10                |
| PLAT005_ALERT_5_G | No _iucr_refine_instructions_details in the CIF  |      |       | ?                 |
| PLAT083_ALERT_2_G | SHELXL Second Parameter in WGHT Unusually Large. |      |       | 50.84             |
| PLAT153_ALERT_1_G | The su's on the Cell Axes are Equal .....        |      |       | 0.00100 Ang.      |
| PLAT301_ALERT_3_G | Note: Main Residue Disorder .....                |      |       | 6 Perc.           |
| PLAT605_ALERT_4_G | Structure Contains Solvent Accessible VOIDS of . |      |       | 459 A**3          |
| PLAT779_ALERT_4_G | Suspect or Irrelevant (Bond) Angle in CIF .... # |      |       | 43                |
|                   | C57                                              | -O3  | -C57  | 2.655 1.555 1.555 |
|                   |                                                  |      |       | 23.80 Deg.        |
| PLAT779_ALERT_4_G | Suspect or Irrelevant (Bond) Angle in CIF .... # |      |       | 134               |
|                   | C16A                                             | -C15 | -C16B | 1.555 1.555 1.555 |
|                   |                                                  |      |       | 31.80 Deg.        |
| PLAT860_ALERT_3_G | Note: Number of Least-Squares Restraints .....   |      |       | 9                 |
| PLAT869_ALERT_4_G | ALERTS Related to the use of SQUEEZE Suppressed  |      |       | !                 |

- 
- 1 **ALERT level A** = Most likely a serious problem - resolve or explain
  - 2 **ALERT level B** = A potentially serious problem, consider carefully
  - 10 **ALERT level C** = Check. Ensure it is not caused by an omission or oversight
  - 13 **ALERT level G** = General information/check it is not something unexpected
- 
- 7 ALERT type 1 CIF construction/syntax error, inconsistent or missing data
  - 11 ALERT type 2 Indicator that the structure model may be wrong or deficient
  - 3 ALERT type 3 Indicator that the structure quality may be low
  - 4 ALERT type 4 Improvement, methodology, query or suggestion
  - 1 ALERT type 5 Informative message, check
- 

It is advisable to attempt to resolve as many as possible of the alerts in all categories. Often the minor alerts point to easily fixed oversights, errors and omissions in your CIF or refinement strategy, so attention to these fine details can be worthwhile. In order to resolve some of the more serious problems it may be necessary to carry out additional measurements or structure refinements. However, the purpose of your study may justify the reported deviations and the more serious of these should normally be commented upon in the discussion or experimental section of a paper or in the "special\_details" fields of the CIF. checkCIF was carefully designed to identify outliers and unusual parameters, but every test has its limitations and alerts that are not important in a particular case may appear. Conversely, the absence of alerts does not guarantee there are no aspects of the results needing attention. It is up to the individual to critically assess their own results and, if necessary, seek expert advice.

### Publication of your CIF in IUCr journals

A basic structural check has been run on your CIF. These basic checks will be run on all CIFs submitted for publication in IUCr journals (*Acta Crystallographica*, *Journal of Applied Crystallography*, *Journal of Synchrotron Radiation*); however, if you intend to submit to *Acta Crystallographica Section C* or *E*, you should make sure that full publication checks are run on the final version of your CIF prior to submission.

### Publication of your CIF in other journals

Please refer to the *Notes for Authors* of the relevant journal for any special instructions relating to CIF submission.

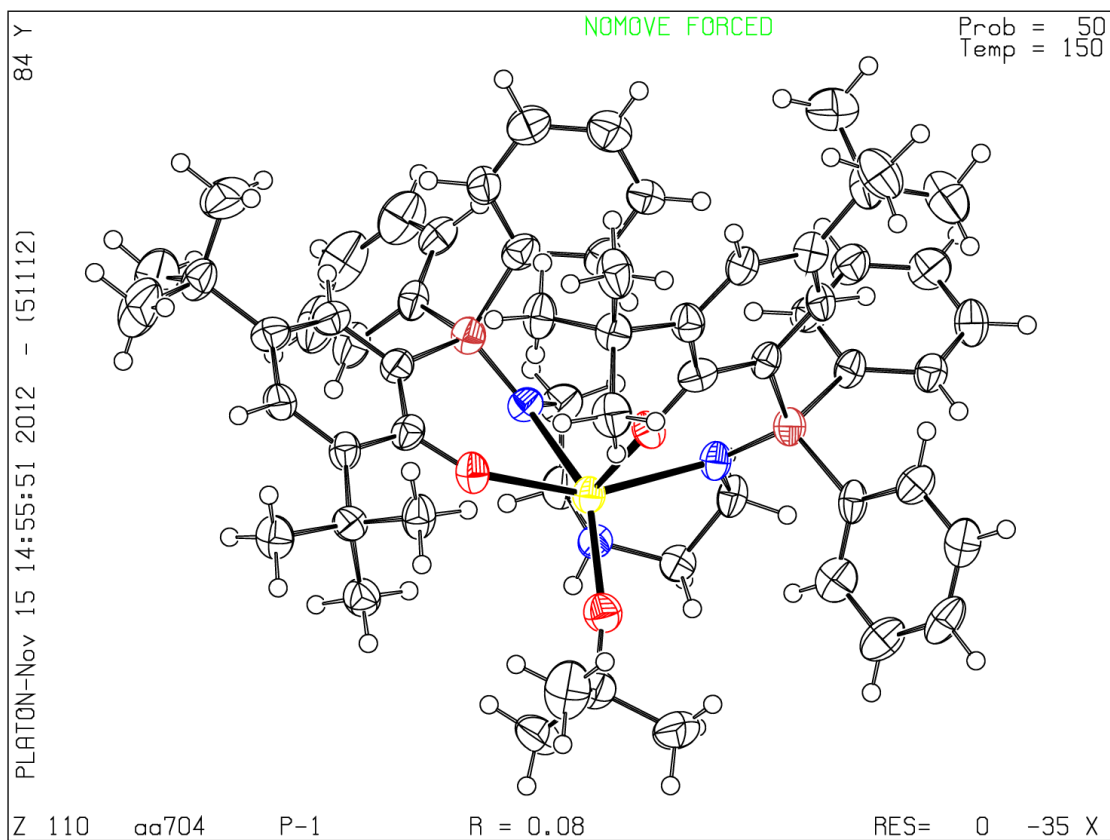

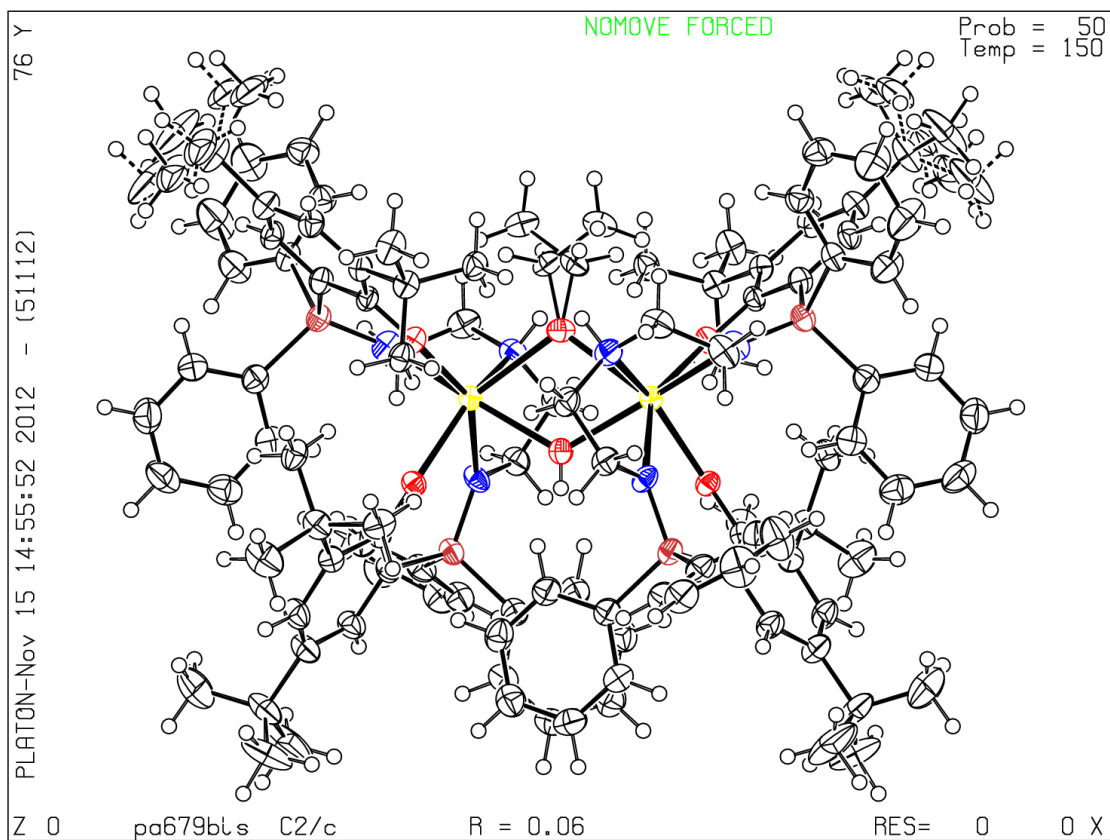

Supplement: Supplementary file 1 [file 4100074]
